# Supplementary material
Source: PubMed Central journal article supplement (PMC4152407)

# Figure S1

## A.

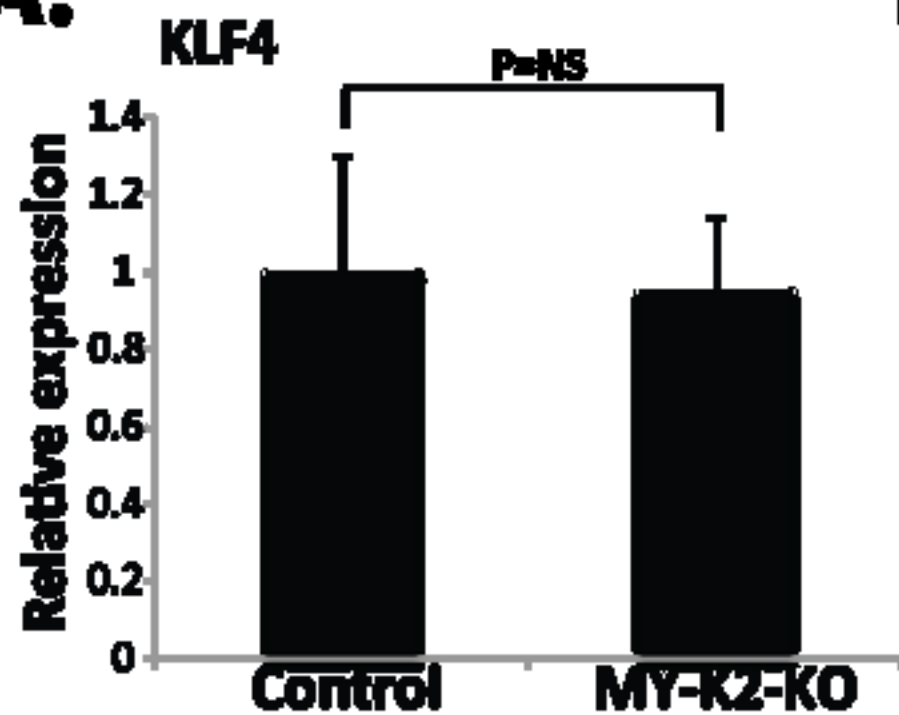

## B.

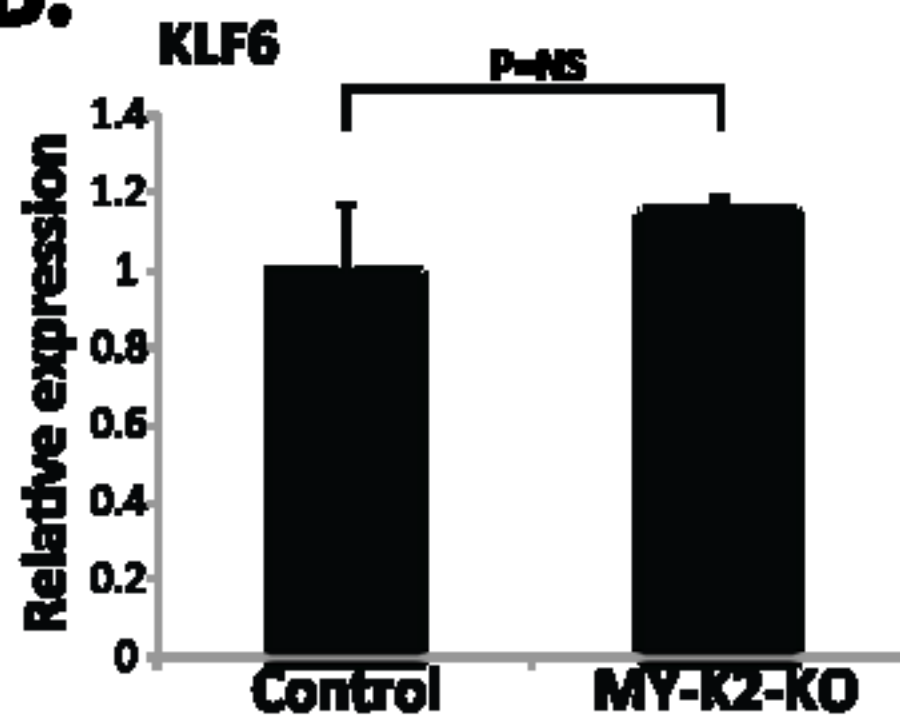

# Figure S2

**A.**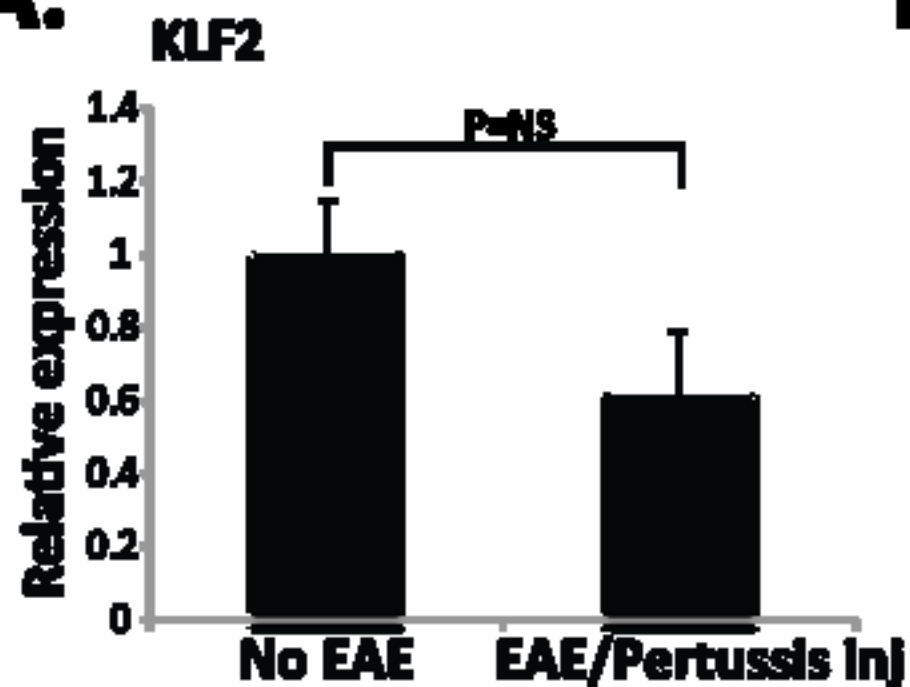**B.**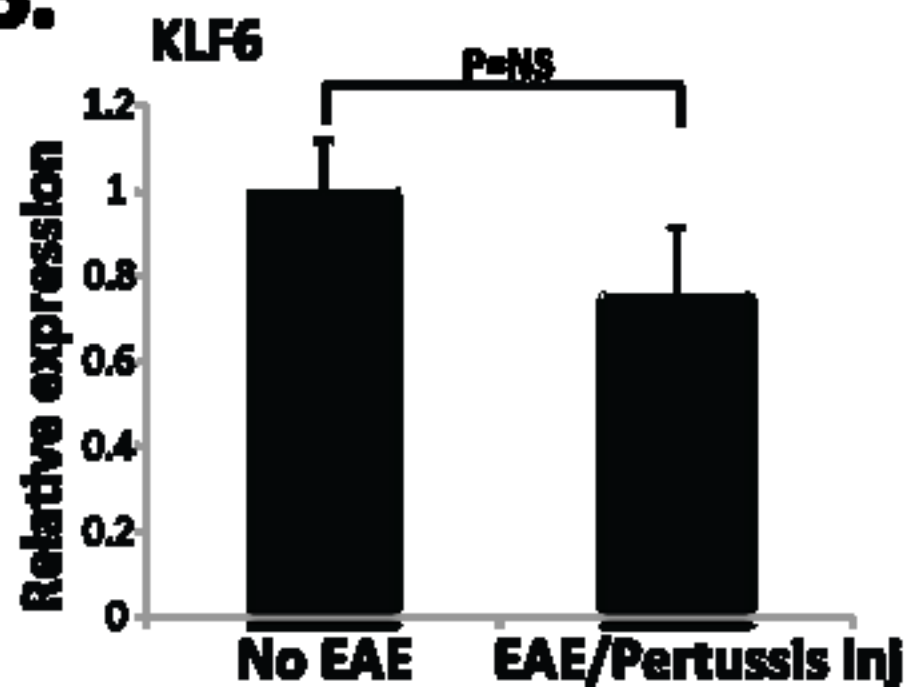

Supplement: NIHMS611424-supplement-01.pdf [file NIHMS611424-supplement-01.pdf]
